# Supplementary material for: RF-induced heating of interventional devices at 23.66 MHz
Source: Springer Nature journal article supplement (doi:10.1007/s10334-023-01099-7), 2023-05-17
Supplement: MOESM1 [file 25373124]

# RF-induced heating of interventional devices at 23.7 MHz

Özen AC<sup>1</sup>, Russe M<sup>2</sup>, Lottner T<sup>1</sup>, Reiss S<sup>1</sup>, Littin S<sup>1</sup>, Zaitsev M<sup>1</sup>, Bock M<sup>1</sup>

<sup>1</sup>Division of Medical Physics, <sup>2</sup>Department of Diagnostic and Interventional Radiology, University Medical Center Freiburg, Faculty of Medicine, University of Freiburg, Freiburg, Germany

Short running title: Safe Interventions at Low Fields

## Supplementary Material

### Supporting Information Figures

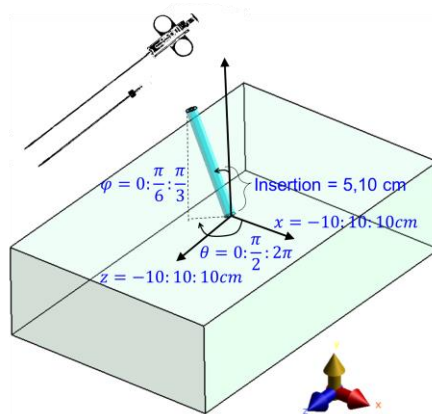

Supporting Information Figure S1: Temperature measurement setup for a coaxial BN pair. The needles were tested for various insertion lengths and positions. The fiber optic temperature probes were placed around the tip of the needles. No significant heating was detected in any of the tested positions.

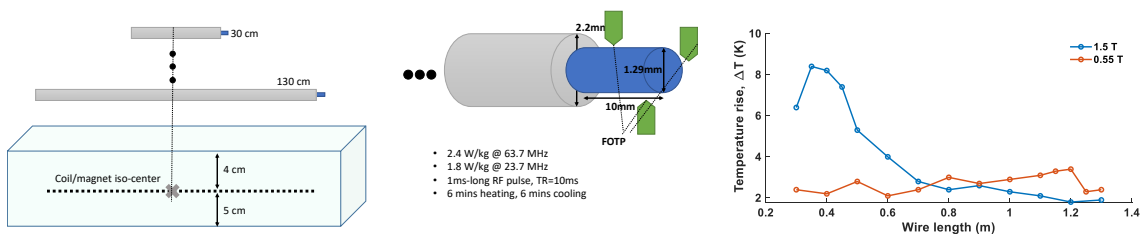

Supporting Information Figure S2: The resonance length at 23.7 MHz was measured to be 120 cm which is above typical device insertion lengths for all studied cases. For the measurements, an insulated wire with an exposed tip was used. At 1.5T, resonance length was measured as 35 cm.

## Supporting Information Tables

Supporting Information Table S1: The results of the temperature measurements and TF-based temperature rise estimations.

| Device  | Position |     |   | $\Delta T_{max}$ (K) |         |         |         | Simulated $\Delta T_{max}$ (K) |         |         |         |
|---------|----------|-----|---|----------------------|---------|---------|---------|--------------------------------|---------|---------|---------|
|         |          |     |   | Coil 1               |         | Coil 2  |         | Coil 1                         |         | Coil 2  |         |
|         | z        | x   | y | 157cm F              | 185cm M | 157cm F | 185cm M | 157cm F                        | 185cm M | 157cm F | 185cm M |
| GW      | 0        | 0   | 0 | 0.4                  | 0.6     | 0.0     | 0.2     | 0.25                           | 0.43    | 0.08    | 0.25    |
|         | 0        | 5   | 0 |                      | 0.7     | 0.1     | 0.2     | 0.15                           | 0.34    | 0.15    | 0.22    |
|         | 0        | 10  | 0 | 0.6                  | 1.1     | 0.2     | 0.4     | 0.45                           | 0.93    | 0.25    | 0.64    |
|         | 0        | -10 | 0 | 0.4                  | 0.4     | 0.1     | 0.2     | 0.41                           | 0.76    | 0.16    | 0.42    |
|         | -5       | 0   | 0 | 0.8                  | 0.5     | 0.1     | 0.3     | 0.29                           | 0.22    | 0.12    | 0.38    |
|         | -10      | 0   | 0 | 0.4                  | 0.7     | 0.0     | 0.2     | 0.30                           | 0.56    | 0.05    | 0.30    |
| GC      | 0        | 0   | 0 | 0.2                  | 0.3     | 0.0     | 0.0     | 0.05                           | 0.07    | 0.09    | 0.12    |
|         | -10      | 0   | 0 |                      | 0.2     | 0.0     | 0.0     |                                | 0.08    |         | 0.18    |
| GW      | 0        | 0   | 0 | 0.2                  | 0.2     | 0.1     | 0.2     | 0.32                           | 0.56    | 0.18    | 0.250   |
|         | 0        | 10  | 0 | 0.4                  | 0.4     | 0.1     | 0.1     | 0.30                           | 0.40    | 0.17    | 0.132   |
|         | 10       | 0   | 0 | 0.4                  | 0.3     | 0.2     | 0.2     | 0.46                           | 0.53    | 0.34    | 0.262   |
|         | -10      | 0   | 0 | 0.2                  | 0.1     | 0.1     | 0.2     | 0.22                           | 0.15    | 0.11    | 0.16    |
| $\mu C$ | 0        | 0   | 0 | 0.5                  | 0.6     | 0.2     | 0.4     | 0.78                           | 1.43    | 0.21    | 0.78    |
|         | 0        | 10  | 0 | 0.6                  | 1.2     | 0.2     | 0.4     | 0.98                           | 1.75    | 0.28    | 0.95    |
|         | 10       | 0   | 0 | 0.6                  | 0.6     | 0.2     | 0.4     | 0.81                           | 0.96    | 0.24    | 0.55    |
|         | -10      | 0   | 0 | 0.4                  | 0.2     | 0.1     | 0.2     | 0.40                           | 0.80    | 0.12    | 0.62    |

## Electromagnetic Simulation Settings

| <b>Simulation Settings</b>       | <b>EM FDTD ASTM phantom</b>                                         |
|----------------------------------|---------------------------------------------------------------------|
| <b>Preparation</b>               |                                                                     |
| Type                             | <i>EM-FDTD Multi-port simulation</i>                                |
| <b>Setup</b>                     |                                                                     |
| Simulation Time                  | 40 Periods                                                          |
| Global Auto Termination          | Medium                                                              |
| <b>Materials</b>                 |                                                                     |
| Phantom/Gel                      | Dielectric                                                          |
|                                  | $\epsilon_r = 80$                                                   |
|                                  | $\sigma = 0.45 \text{ S/m}$                                         |
|                                  | $\rho = 1000 \text{ kg/m}^3$                                        |
| Conductors                       | PEC                                                                 |
| <b>Sources</b>                   |                                                                     |
| Type                             | 2xEdge port                                                         |
| Excitation signal                | Gaussian                                                            |
| Frequency                        | 23.7 MHz with 20 MHz span                                           |
| Reference Load                   | Perfect matching assumed                                            |
| <b>Lumped elements</b>           |                                                                     |
| <b>Element type</b>              | <b>Inductor/ capacitor for the generic birdcage</b>                 |
| Calculated Self-Inductances      |                                                                     |
| Legs                             | 267.70                                                              |
| Endrings                         | 62.17                                                               |
| Calculated Effective Inductances |                                                                     |
| Legs                             | 153.87                                                              |
| Endrings                         | 102.66                                                              |
| <b>Calculated Capacitances</b>   |                                                                     |
| Capacitance Value                | 30.11                                                               |
| Strength                         | Medium                                                              |
| <b>Grid</b>                      | 306x306x120<br>11.2 MCells                                          |
| <b>Solver</b>                    |                                                                     |
| Parallelization handling         | Automatic                                                           |
| Kernel                           | CUDA                                                                |
| Solver mode                      | FDTD                                                                |
| <b>Analysis</b>                  |                                                                     |
| Overall field                    | Simulation combiner                                                 |
| Tangential E field               | Interpolation over line profiles extracted from the vascular models |

3D models and capacitor values of a generic birdcage coil, phantom, vascular models and the Python scripts used in analysis of the simulation results can be downloaded from [https://github.com/ozenEEE/UKF\\_SafeLowB0](https://github.com/ozenEEE/UKF_SafeLowB0).
